# Supplementary material for: Enhanced Expansion of Human Pluripotent Stem Cells and Somatic Cell Reprogramming Using Defined and Xeno-Free Culture Conditions
Source: MDPI journal article supplement (doi:10.3390/bioengineering10090999), 2023-08-24

## Supplementary Figure S1

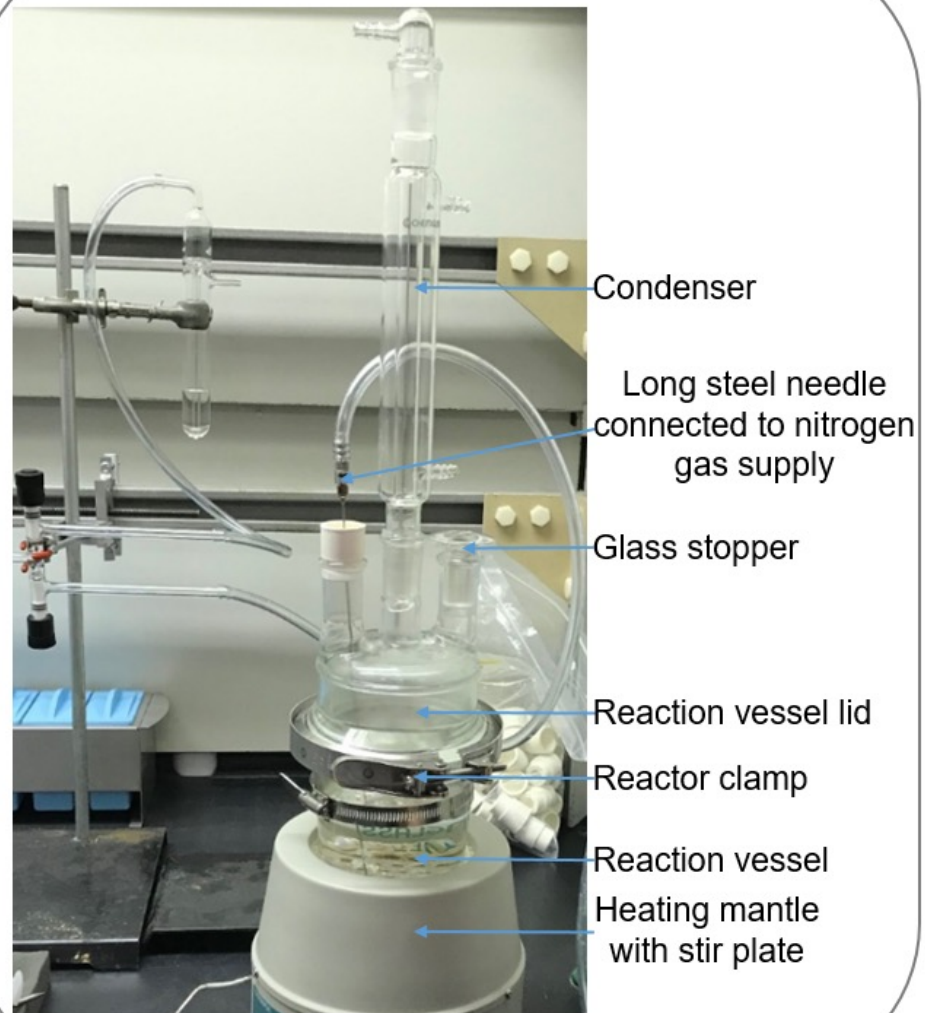

## Supplementary Figure S2

**A**

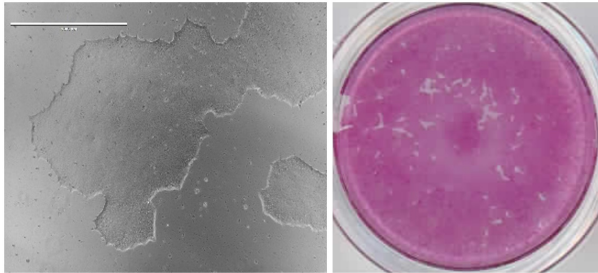

**B**

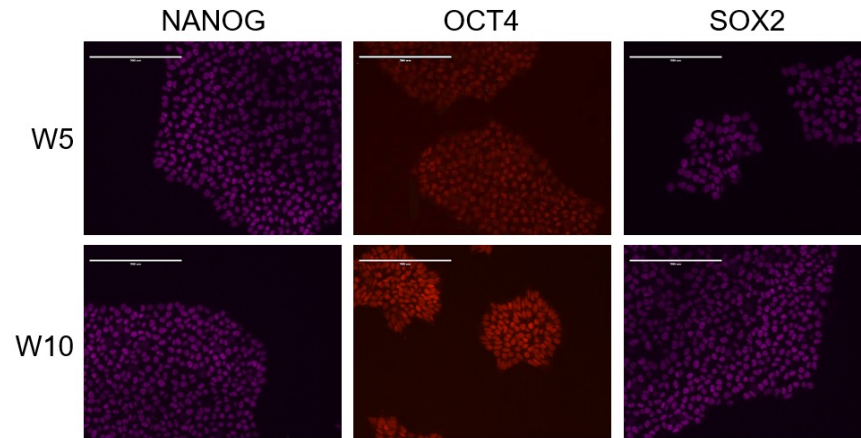

**C**

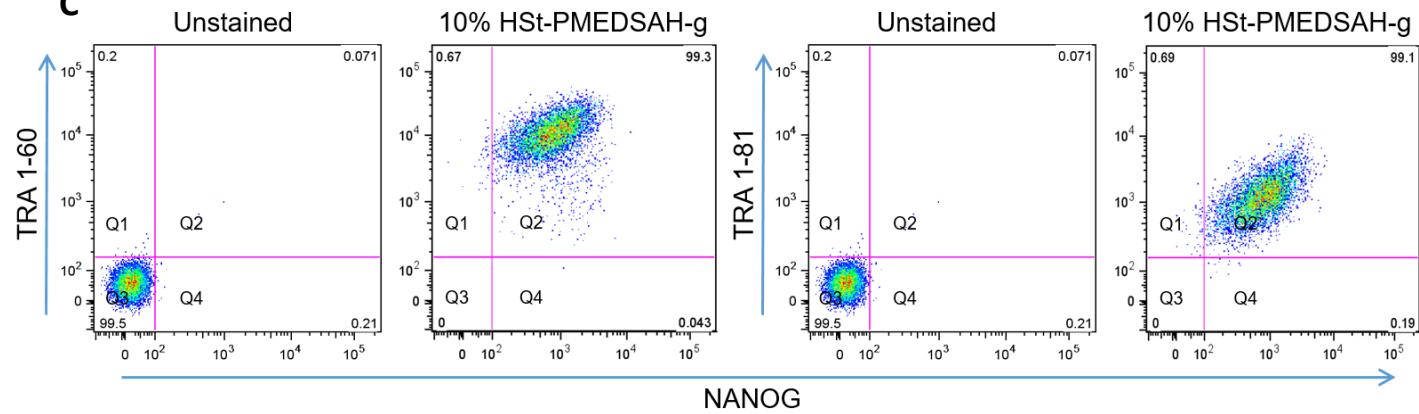

Supplementary Figure S3

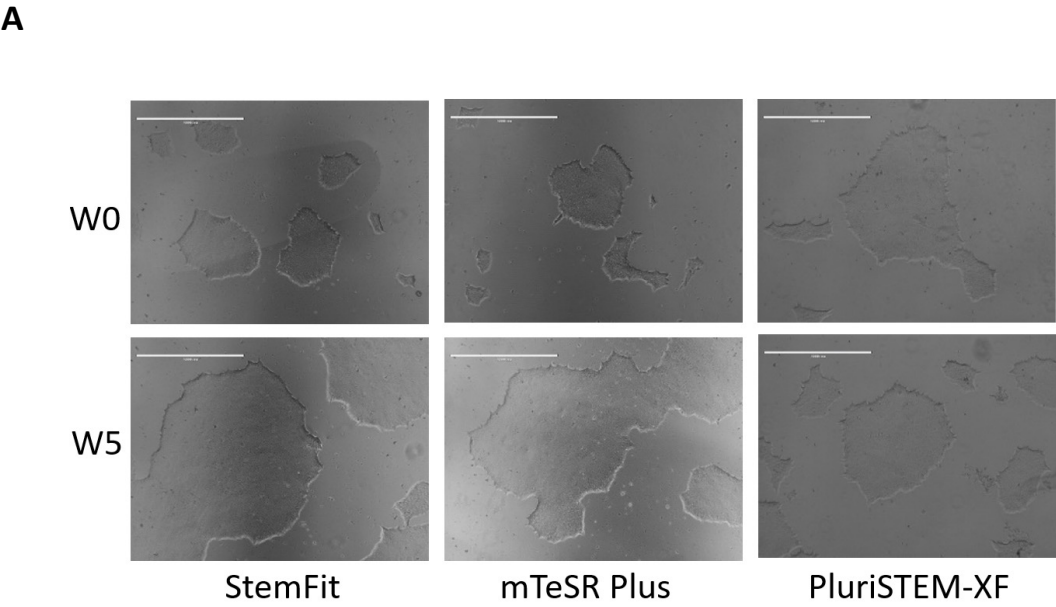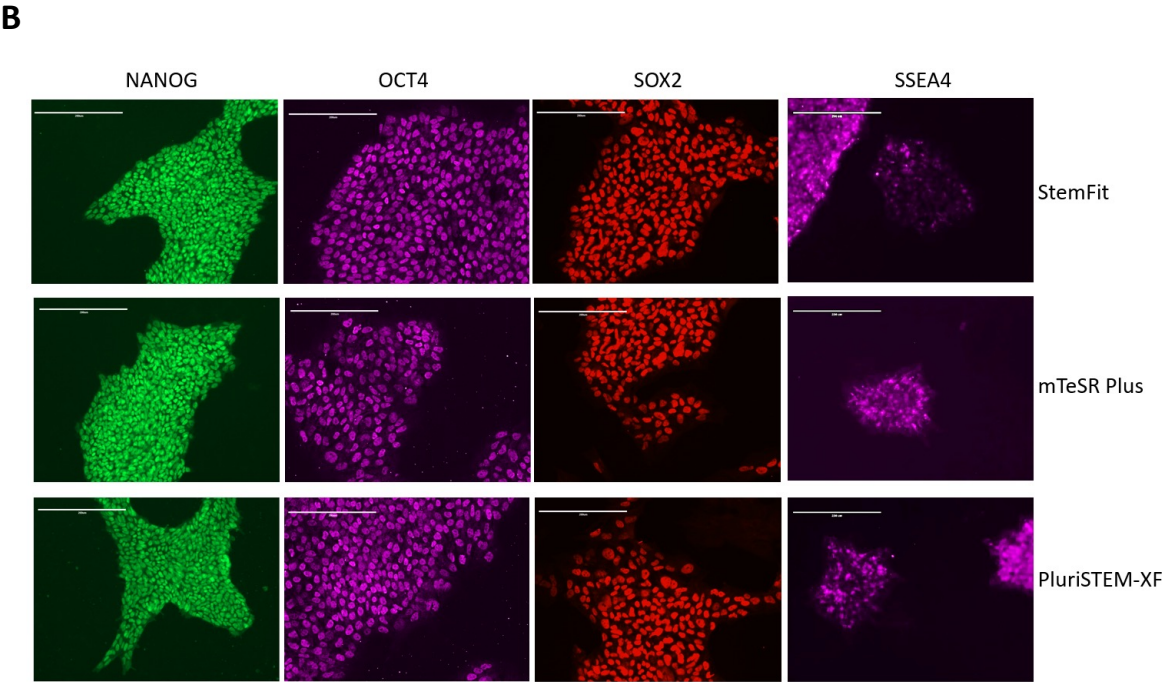

**Supplementary Figure S4**

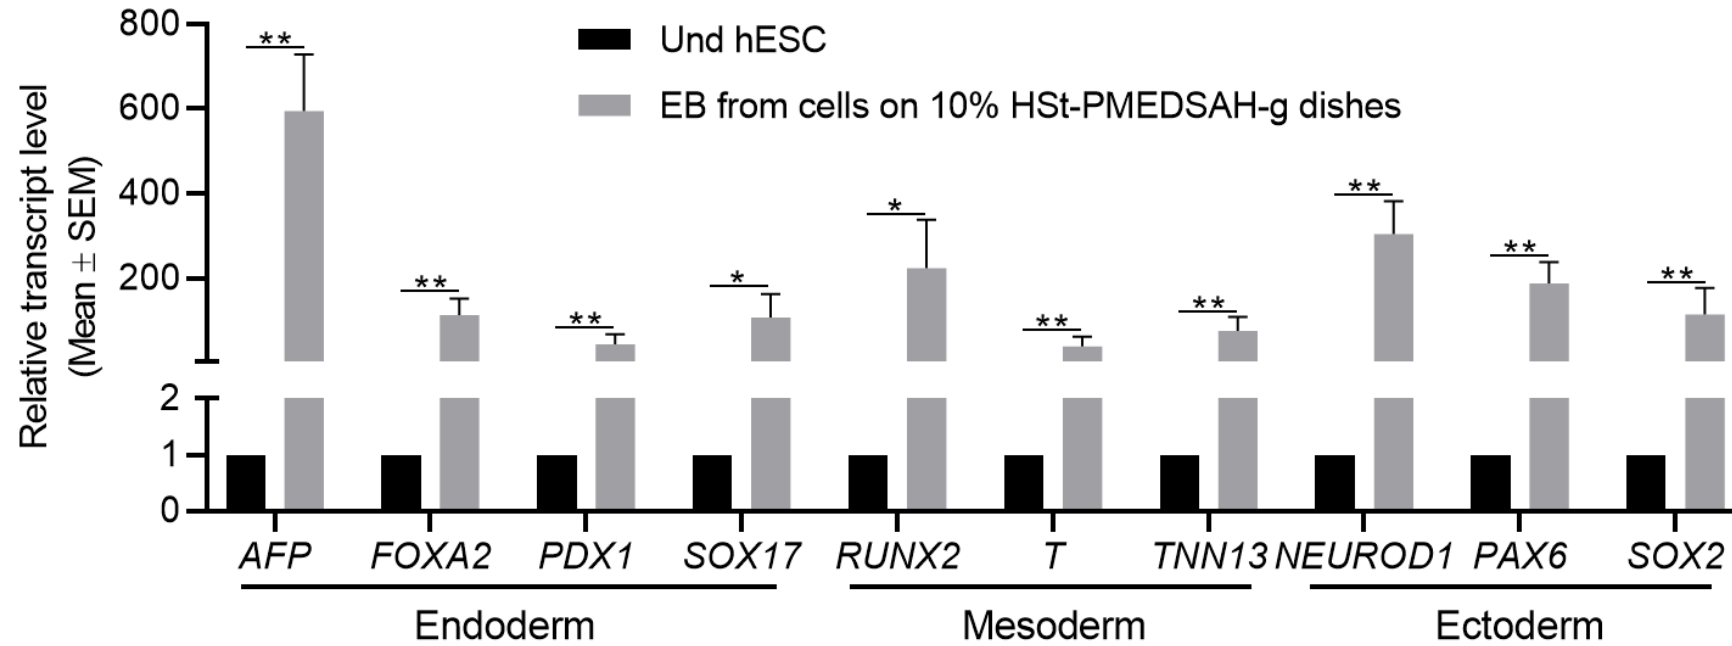

## Supplementary Figure S5

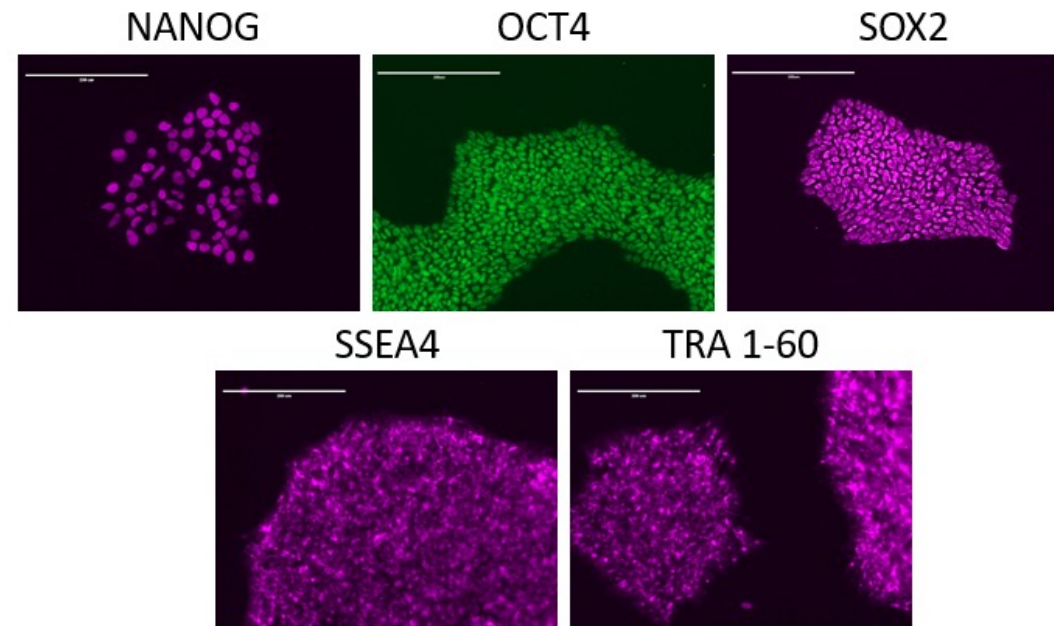

Supplement: s1 [file s1]
