# Supplementary material for: Enhanced Expansion of Human Pluripotent Stem Cells and Somatic Cell Reprogramming Using Defined and Xeno-Free Culture Conditions
Source: MDPI journal article supplement (doi:10.3390/bioengineering10090999), 2023-08-24
Supplement: s1 [file s1]

**Supplementary Table S1**

| <b>Medium</b>      | <b>Components</b>                                                                                                                     | <b>XF/CD</b> |
|--------------------|---------------------------------------------------------------------------------------------------------------------------------------|--------------|
| <b>StemFlex™</b>   | <b>DMEM/F12 bFGF, TGFβ, insulin, transferrin, selenium, ascorbic acid</b>                                                             | <b>✓</b>     |
| <b>mTeSR™ Plus</b> | <b>DMEM/F12, with recombinant HSA, bFGF, TGFβ, insulin, transferrin, cholesterol, lipids, pipecolic acid, GABA, β-mercaptoethanol</b> | <b>✓</b>     |
| <b>PluriSTEM™</b>  | <b>DMEM/F12, HSA Activin A, TGFβ1, bFGF, lipids, insulin, transferrin, selenium</b>                                                   | <b>✓</b>     |
| <b>StemFit®</b>    | <b>DMEM/F12, BSA bFGF, TGFβ, Activin, transferrin, LR3-IGF1, HRG1β</b>                                                                | <b>✓</b>     |

**Supplementary Table 2**

| <b>Gene Symbol</b> | <b>Assay ID</b> |
|--------------------|-----------------|
| AFP                | HS00173490_m1   |
| CDX2               | Hs01078080_m1   |
| FOXA2              | Hs00232764_m1   |
| GAPDH              | Hs02786624_g1   |
| GATA4              | Hs00171403_m1   |
| NEUROD1            | Hs00159598_m1   |
| PAX6               | Hs00240871_m1   |
| RUNX2              | Hs01047973_m1   |
| SOX2               | Hs00602736_s1   |
| T                  | Hs00610080_m1   |
| PDX1               | Hs00236830_m1   |
| SOX17              | Hs00751752_m1   |
| TNN13              | Hs00165957_m1   |
| FGF4               | Hs00908886_m1   |
| GDF3               | Hs00214087_m1   |
| HAND1              | Hs00153453_m1   |
| NKX2.5             | Hs00231763_m1   |
| TBX3               | Hs00195612_m1   |
| COL2A1             | Hs00116540_m1   |
| MYO3B              | Hs00510587_m1   |
| SOX1               | Hs00846583_m1   |

**Supplementary Table 3**

| <b>Gene</b> | <b>Category</b> |
|-------------|-----------------|
| ACTB        | Controls        |
| CTCF        | Controls        |
| EP300       | Controls        |
| SMAD1       | Controls        |
| CDH9        | Ectoderm        |
| COL2A1      | Ectoderm        |
| DMBX1       | Ectoderm        |
| DRD4        | Ectoderm        |
| EN1         | Ectoderm        |
| LMX1A       | Ectoderm        |
| MAP2        | Ectoderm        |
| MYO3B       | Ectoderm        |
| NOS2        | Ectoderm        |
| NR2F1/NR2F2 | Ectoderm        |
| NR2F2       | Ectoderm        |
| OLFM3       | Ectoderm        |
| PAPLN       | Ectoderm        |
| PAX3        | Ectoderm        |
| PAX6        | Ectoderm        |
| POU4F1      | Ectoderm        |
| PRKCA       | Ectoderm        |
| SDC2        | Ectoderm        |
| SOX1        | Ectoderm        |
| TRPM8       | Ectoderm        |
| WNT1        | Ectoderm        |
| ZBTB16      | Ectoderm        |
| AFP         | Endoderm        |
| CABP7       | Endoderm        |
| CDH20       | Endoderm        |
| CLDN1       | Endoderm        |
| CPLX2       | Endoderm        |
| ELAVL3      | Endoderm        |
| EOMES       | Endoderm        |
| FOXA1       | Endoderm        |
| FOXA2       | Endoderm        |

|         |             |
|---------|-------------|
| FOXP2   | Endoderm    |
| GATA4   | Endoderm    |
| GATA6   | Endoderm    |
| HHEX    | Endoderm    |
| HMP19   | Endoderm    |
| HNF1B   | Endoderm    |
| HNF4A   | Endoderm    |
| KLF5    | Endoderm    |
| LEFTY1  | Endoderm    |
| LEFTY2  | Endoderm    |
| NODAL   | Endoderm    |
| PHOX2B  | Endoderm    |
| POU3F3  | Endoderm    |
| PRDM1   | Endoderm    |
| RXRG    | Endoderm    |
| SOX17   | Endoderm    |
| SST     | Endoderm    |
| FGF4    | Mesendoderm |
| GDF3    | Mesendoderm |
| NPPB    | Mesendoderm |
| NR5A2   | Mesendoderm |
| PTHLH   | Mesendoderm |
| T       | Mesendoderm |
| ABCA4   | Mesoderm    |
| ALOX15  | Mesoderm    |
| BMP10   | Mesoderm    |
| CDH5    | Mesoderm    |
| CDX2    | Mesoderm    |
| COLEC10 | Mesoderm    |
| ESM1    | Mesoderm    |
| FCN3    | Mesoderm    |
| FOXF1   | Mesoderm    |
| HAND1   | Mesoderm    |
| HAND2   | Mesoderm    |
| HEY1    | Mesoderm    |
| HOPX    | Mesoderm    |
| IL6ST   | Mesoderm    |
| NKX2-5  | Mesoderm    |
| ODAM    | Mesoderm    |
| PDGFRA  | Mesoderm    |
| PLVAP   | Mesoderm    |

|        |              |
|--------|--------------|
| RGS4   | Mesoderm     |
| SNAI2  | Mesoderm     |
| TBX3   | Mesoderm     |
| TM4SF1 | Mesoderm     |
| CD44   | Other        |
| JARID2 | Other        |
| MYC    | Other        |
| SEV    | Other        |
| CXCL5  | Self-renewal |
| DNMT3B | Self-renewal |
| HESX1  | Self-renewal |
| IDO1   | Self-renewal |
| LCK    | Self-renewal |
| NANOG  | Self-renewal |
| POU5F1 | Self-renewal |
| SOX2   | Self-renewal |
| TRIM22 | Self-renewal |

**Supplementary Table 4**

| Conditions                                                                           | Calculated total cell numbers from week 0 to week 5 |                   |                   |                   |                   |                   |
|--------------------------------------------------------------------------------------|-----------------------------------------------------|-------------------|-------------------|-------------------|-------------------|-------------------|
| hPSC culture on PMEDSAH-g plates with StemFlex medium supplemented for 12 hours with | W0                                                  | W1                | W2                | W3                | W4                | W5                |
| 1% HS                                                                                | $1 \times 10^4$                                     | $1.1 \times 10^5$ | -                 | -                 | -                 | -                 |
| 10% HS                                                                               | $1 \times 10^4$                                     | $2.7 \times 10^5$ | $1.8 \times 10^4$ | -                 | -                 | -                 |
| 100% HS                                                                              | $1 \times 10^4$                                     | $3.1 \times 10^5$ | -                 | -                 | -                 | -                 |
|                                                                                      |                                                     |                   |                   |                   |                   |                   |
| hPSC culture on PMEDSAH-g plates treated for 30 minutes at room temperature with     | W0                                                  | W1                | W2                | W3                | W4                | W5                |
| 1% HS/DMEM/F12 (1% HSt-PMEDSAH-g)                                                    | $1 \times 10^4$                                     | $1.1 \times 10^5$ | $2.9 \times 10^5$ | $1.6 \times 10^4$ | $6.1 \times 10^3$ | -                 |
| 10% HS/DMEM/F12 (10% HSt-PMEDSAH-g)                                                  | $1 \times 10^4$                                     | $4.7 \times 10^5$ | $3.8 \times 10^6$ | $9.9 \times 10^6$ | $5.0 \times 10^7$ | $4.9 \times 10^8$ |
| 100% HS (100% HSt-PMEDSAH-g)                                                         | $1 \times 10^4$                                     | $2.7 \times 10^5$ | $3.2 \times 10^3$ | -                 | -                 | -                 |
|                                                                                      |                                                     |                   |                   |                   |                   |                   |
| hPSC culture on TCPS (as control) treated for 30 minutes at room temperature with    | W0                                                  | W1                | W2                | W3                | W4                | W5                |
| 1% HS/DMEM/F12                                                                       | $1 \times 10^4$                                     | -                 | -                 | -                 | -                 | -                 |
| 10% HS/DMEM/F12                                                                      | $1 \times 10^4$                                     | $3.7 \times 10^2$ | -                 | -                 | -                 | -                 |
| 100% HS/DMEM/F12                                                                     | $1 \times 10^4$                                     | -                 | -                 | -                 | -                 | -                 |
